# Supplementary material for: RETRACTED: Protein Tyrosine Phosphatase Non-Receptor 11 (PTPN11/Shp2) as a Driver Oncogene and a Novel Therapeutic Target in Non-Small Cell Lung Cancer (NSCLC)
Source: MDPI journal article supplement (doi:10.3390/ijms241310545), 2023-06-23
Supplement: s1 [file s1]

Table S1: List of mutations analysed using the Agena MassArray technology

|               |                                                                                                                                                                                              |
|---------------|----------------------------------------------------------------------------------------------------------------------------------------------------------------------------------------------|
| <b>AKT1</b>   | E17K, E49K, G173R, K179M                                                                                                                                                                     |
| <b>AKT2</b>   | E17K, G175R                                                                                                                                                                                  |
| <b>AKT3</b>   | E17K, G171R                                                                                                                                                                                  |
| <b>ALK</b>    | L560F, A877S, D1091N, M1166R, I1171N, F1174C/S/L/L/I/V, F1245C/L/V/I, R1275Q/L                                                                                                               |
| <b>APC</b>    | R1114X, E1306X, E1338X, Q1367X, E1379X, Q1429X, R1450X                                                                                                                                       |
| <b>BRAF</b>   | R444Q, R462I, I463S, G464E/V/A/R, G466R/E/V/A, G469A/E/R/V, V471F, Y472S, E586K, D587A/E, I592M/V, D594E/V/G, F595L/L/L/S, G596R, L597R/R/Q/V, T599I, V600E/A/G/L/M, K601E/N/N, S605N, G615R |
| <b>CDK4</b>   | R24C/H                                                                                                                                                                                       |
| <b>CDKN1B</b> | P117S                                                                                                                                                                                        |
| <b>CDKN2A</b> | R58X, E61X, E69X, R80X, H83Y, E88X                                                                                                                                                           |
| <b>CTNNB1</b> | A13T, A21T, V22A, D32A/G/V/H/N/Y, S33A/P/T, G34E/V/A/R/R, I35N/S/T, H36P/R/Y, S37A/P/T/C/F/Y, T41A/P/S/I/N/S, S45A/P/T/C/F/Y                                                                 |
| <b>DDR2</b>   | R105S, N456S, T533K                                                                                                                                                                          |
| <b>EGFR</b>   | V689M, N700D, E709A/V/G/K/Q, G719A/D/C/S/R, S720T/P, D761N/Y, V769L/M, T783A, A839T, K846R, L858M/R, L861Q/R, G863D, H870R, E844K                                                            |
| <b>ERBB2</b>  | S310F/Y, L755S, G776S/V, D769H, V777A/L/M, V842I, H878Y                                                                                                                                      |
| <b>FBXO4</b>  | S8R, S12L, L23Q, P76T                                                                                                                                                                        |
| <b>FBXW7</b>  | R465C/H/L, R479G/Q/L, R505C/S/H/L/P, S582L                                                                                                                                                   |
| <b>FGFR1</b>  | S125L, P252T                                                                                                                                                                                 |
| <b>FGFR2</b>  | S252W, Y375C, N549K/K                                                                                                                                                                        |
| <b>FGFR3</b>  | R248C, S249C, G370C, S371C, Y373C, G380R, A391E, K650E/Q/M/T, G697C                                                                                                                          |
| <b>GNA11</b>  | Q209L/P, R138C                                                                                                                                                                               |
| <b>GNAS</b>   | R201H/S/C, Q227H/L/R                                                                                                                                                                         |
| <b>GNAQ</b>   | Q209L/P/R                                                                                                                                                                                    |
| <b>HRAS</b>   | G12S/R/C/D/A/V, G13S/R/C, Q61H/H/Q/K/L/P/R, E62G                                                                                                                                             |

|                |                                                                                                                                                                                                                                                              |
|----------------|--------------------------------------------------------------------------------------------------------------------------------------------------------------------------------------------------------------------------------------------------------------|
| <b>IDH1</b>    | G70D, R132C/G/S/H/L, V178I                                                                                                                                                                                                                                   |
| <b>IDH2</b>    | R172G/W/M/K/S                                                                                                                                                                                                                                                |
| <b>KIT</b>     | M552L, Y553N, W557G/R/R, K558N/R, V559A/D/G/I, V560D/A, G565R, N566D, Y568D, V569G, P573L, F584S, L576P, E561K, K642E, V654A, T670I, D716N, D816E/H/N/Y/G/V/A, D820E/E/H/Y/A/G, N822K/N/K/Y/H, Y823D/N                                                       |
| <b>KRAS</b>    | G12D/A/V/S/R/C, KRASG13D/A/V/S/R/C, L19F/F, Q22K, T58I, A59T/G/E, G60D, Q61E/K/X/H/H/Q/L/P/R, A146P/T                                                                                                                                                        |
| <b>MAP2K1</b>  | F53C/S, Q56P, K57N, P124L/T/S, E203K/Q                                                                                                                                                                                                                       |
| <b>MAP2K2</b>  | E207K/Q, R388Q                                                                                                                                                                                                                                               |
| <b>MAP3K13</b> | P373S, S694L, R880C, A882S                                                                                                                                                                                                                                   |
| <b>MET</b>     | E168D, N375S, R970C, T1010I, R1112R/L/Y, H1124D, M1131T, Y1248C/H/D, Y1253D, M1268T                                                                                                                                                                          |
| <b>MLH1</b>    | V384D                                                                                                                                                                                                                                                        |
| <b>MYC</b>     | P57S, T58A                                                                                                                                                                                                                                                   |
| <b>NCOR1</b>   | R108X, Q313X, E379X, I1422S, Q1792X                                                                                                                                                                                                                          |
| <b>NRAS</b>    | G12D/A/V/S/R/C, G13D/A/V/S/R/C, A18T, Q61E/K/X/H/H/Q/R/P/L                                                                                                                                                                                                   |
| <b>PDGFRA</b>  | V561D, N659K/Y, D842Y/N/V, D846Y, Y849C, D1071N                                                                                                                                                                                                              |
| <b>PIK3CA</b>  | R38H, Q60K, R88Q, K111N, G118D, N345K, S405F, E418K, C420R, E453K, P539R, E542K/Q/V/G, E545D/K/Q/A/V/G, Q546H/E/K/L/P/R, C901F, F909L/L, M1004I, G1007R, Y1021C/H/N, R1023Q, T1025A/S/I, A1035T/V, M1043I/I/I/V, A1046V, H1047R/L/Y, G1049R, I1058F, H1065L, |
| <b>PIK3R1</b>  | G376R, D560Y, N564D                                                                                                                                                                                                                                          |
| <b>PTEN</b>    | R130L/P/Q/X, R173C/H, R233X, R335X                                                                                                                                                                                                                           |
| <b>PTPN11</b>  | S72D/V/T, E69K, E76A/G/V/Q/K                                                                                                                                                                                                                                 |
| <b>RB1</b>     | E137X, L199X, R320X, R358X, R455X, R552X, R556X, R579X, C706F, E748X                                                                                                                                                                                         |
| <b>RET</b>     | C634R/W/Y, A664D, E768D, M918T                                                                                                                                                                                                                               |
| <b>SMARCD</b>  | Q539X, D391H, Q504X                                                                                                                                                                                                                                          |
| <b>SOS1</b>    | R248H, R688Q, H888Q                                                                                                                                                                                                                                          |
| <b>SRC</b>     | Q531X                                                                                                                                                                                                                                                        |

**STK11** Q37X, Q170X, D194N/Y/V, G196V, E199X/K, P281L, W332X, F354L

**TBX3** Y163X, W197X

**VHL** P81X, L85P, L89H, L158Q/V, R161X, R167W

---

Table S2: Antibodies used for western blotting, including the company from which it was purchased, the catalog number, the host species and the dilution at which it was used. CST – Cell Signalling Technologies

| <b>Antibody</b>           | <b>Catalog #</b> | <b>Company</b> | <b>Dilution</b> | <b>Host</b> |
|---------------------------|------------------|----------------|-----------------|-------------|
| AKT                       | 4691             | CST            |                 | Rabbit      |
| AKT (S473)                | 9271             | CST            |                 | Rabbit      |
| MAPK-ERK1/2               | 9102             | CST            |                 | Rabbit      |
| MAPK (T202/Y204) – ERK1/2 | 4377             | CST            |                 | Rabbit      |
